# Supplementary material
Source: publisher figshare collection journal article supplement (https://acs.figshare.com/ndownloader/files/3768244)
Supplement: Supplementary file 1 [file 3768244]

# Supporting Information

## A Kinetic Approach to Investigate the Mechanistic Pathways of Oxygen Reduction Reaction on Fe-Containing N-Doped Carbon Catalysts

*Azhagumuthu Muthukrishnan<sup>1</sup>, Yuta Nabae<sup>2</sup>, Takeyoshi Okajima<sup>1</sup>,*

*Takeo Ohsaka<sup>1,\*</sup>*

<sup>1</sup>Department of Electronic Chemistry, Interdisciplinary Graduate School of Science and Engineering, Tokyo Institute of Technology, G1-5, 4259 Nagatsuta, Midori-ku, Yokohama 226-8502, Japan.

<sup>2</sup>Department of Organic and Polymeric Materials, Graduate School of Science and Engineering, Tokyo Institute of Technology, 2-12-1, Ookayama, Meguro-ku, Tokyo 152-8552, Japan.

E-mail: [ohsaka@echem.titech.ac.jp](mailto:ohsaka@echem.titech.ac.jp) (T. Ohsaka)

## Koutecký-Levich analysis

The RRDE voltammograms were analysed using the Koutecký-Levich equation as shown below

$$\frac{1}{i_D} = \frac{1}{i_k} + \frac{1}{i_{DL}} \quad (S1)$$

where  $i_k$  is the kinetic current density at a given potential and  $i_{DL}$  can be estimated from the Levich equation ( $i_{DL} = 0.62nFD_{O_2}^{2/3}\nu^{-1/6}C_{O_2}^b\omega^{1/2}$ ;  $F$  is the Faraday constant,  $D_{O_2}$  and  $C_{O_2}^b$  are the diffusion coefficient ( $1.4\times 10^{-5}$ ) and bulk concentration ( $1.13\times 10^{-6}$  mol cm<sup>3</sup>) of O<sub>2</sub> dissolved in solution, respectively,  $\nu$  is the kinematic viscosity of the solution (0.01 cm<sup>2</sup> s<sup>-1</sup>) and  $\omega$  is the rotational speed). The  $1/i_D$  vs.  $\omega^{-1/2}$  plots are linear at mass-transport limiting region (at 0.1 V vs. RHE) as shown in Figure S1(A) for various loading densities of Fe-N-C catalysts. The  $i_k$  is estimated from the intercept of the  $1/i$  vs.  $\omega^{-1/2}$  (Koutecký-Levich) plot, which increases with increasing the loading density (Table S1). The number of electrons ( $n$ ), estimated from the slope of the Koutecký-Levich plot, increases with increasing the loading density and is found to be very close to 4 at 300 µg/cm<sup>2</sup>. The  $i_k$  values at higher loading densities indicate that the ORR is solely controlled by the mass-transport of O<sub>2</sub> molecules to the electrode surface. As shown in Figure S1(A), the experimental plots give almost the same slope as expected for 4-electron ORR.

A similar methodology is adopted for the N-C catalyst to estimate the  $i_k$  and  $n$  at various loading densities. At low loading density (40 µg cm<sup>-2</sup>),  $n$  is close to 2 whereas the value of  $n$  is increased to 3.8 at 300 µg/cm<sup>2</sup>. Also,  $i_k$  value increases with increasing the loading density. The values of  $n$  and  $i_k$  are summarized in the Table S1 for both Fe-N-C and N-C catalysts. The  $i_k$  value of the Fe-N-C catalyst is 3.3 times larger than that of the N-C catalyst at 40 µg cm<sup>-2</sup>. However, this difference is decreased at high loading density, i.e., at 300 µg cm<sup>-2</sup>, is

only 1.6 times, indicating the increased ORR performance. It can be seen from Figure S1(B) that the plot at the low loading density (e.g., 40  $\mu\text{g cm}^{-2}$ ) gives the slope close to that obtained for the 2-electron reduction and the slopes close to that expected for the 4-electron reduction are obtained at the loading densities greater than 200  $\mu\text{g cm}^{-2}$ .

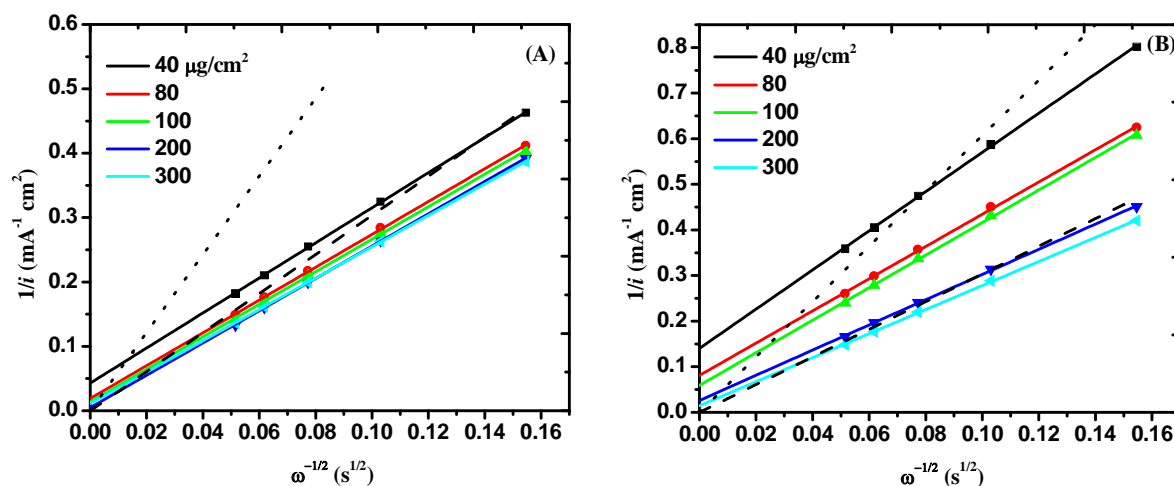

**Figure S1:** Koutecký-Levich plots for the Fe-N-C (A) and N-C (B) catalysts at the limiting current region (0.1 V) for various loading densities. The theoretical plots for the 4-electron (dashed line) and the 2-electron (dotted line) reduction of oxygen are shown.

Table S1. Values of  $n$  and  $i_k$  for the Fe-N-C and N-C catalysts at various loading densities.

| Loading density( $\mu\text{g/cm}^2$ ) | Fe-N-C |                               | N-C |                               |
|---------------------------------------|--------|-------------------------------|-----|-------------------------------|
|                                       | $n$    | $i_k$ ( $\text{mA cm}^{-2}$ ) | $n$ | $i_k$ ( $\text{mA cm}^{-2}$ ) |
| 40                                    | 3.7    | 23.3                          | 2.3 | 7.1                           |
| 80                                    | 3.9    | 52.4                          | 2.8 | 12.3                          |
| 100                                   | 4.0    | 71.9                          | 2.8 | 16.9                          |
| 200                                   | 4.0    | 128.7                         | 3.6 | 38.5                          |
| 300                                   | 4.1    | 107.3                         | 3.8 | 68.9                          |

## Evaluation of ORR rate constants at zero loading density

To estimate the rate constants at zero loading density we have employed a method of plotting the loading density vs. rate constant, i.e., a linear fitting of such plots leads to the intercepts which are referred to as rate constants at zero loading density. The loading density normalised rate constants ( $k_1/\Gamma$ ,  $k_2/\Gamma$  and  $k_3/\Gamma$ ) for the Fe-N-C and N-C catalysts are shown in Figures S2 and S3, respectively.

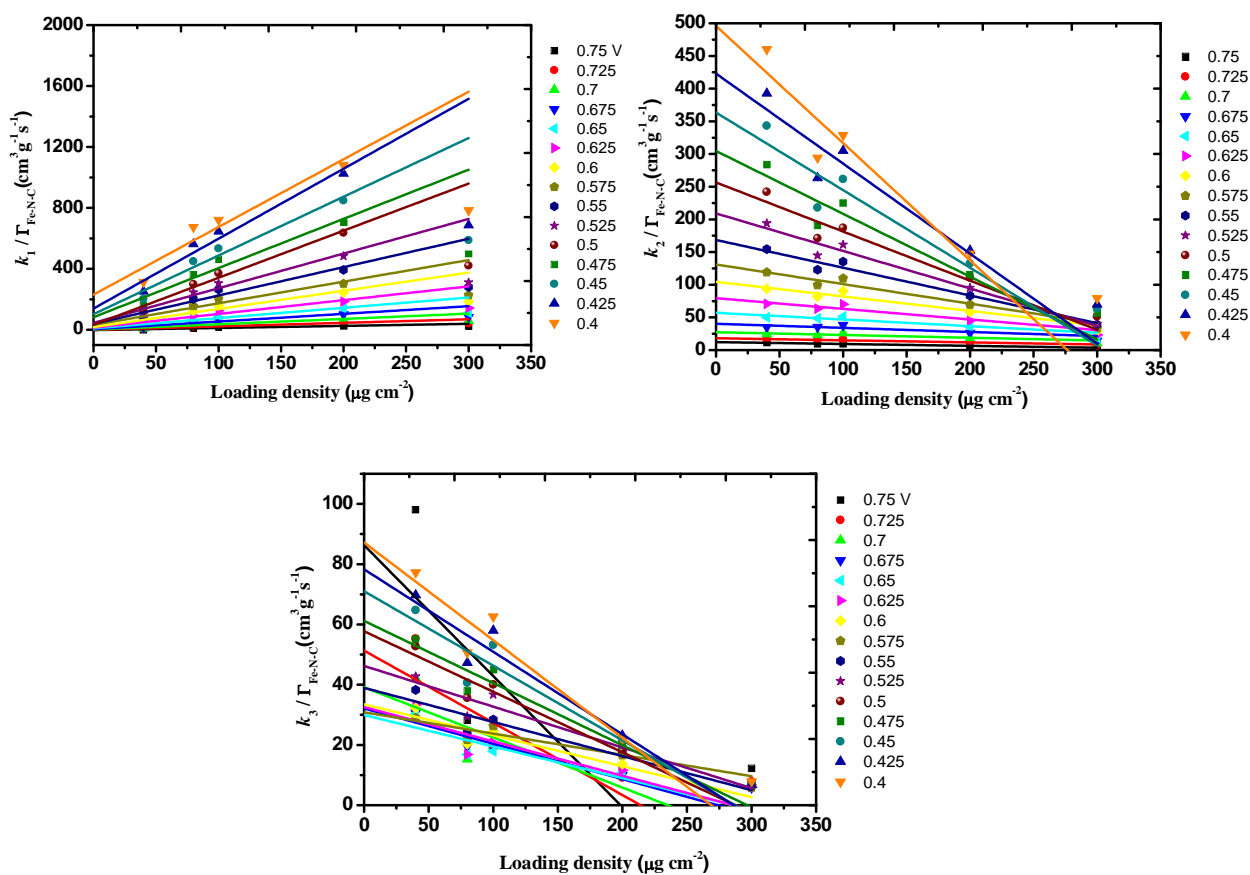

**Figure S2:** The loading density dependence of the loading density-normalised rate constants ( $k_i/\Gamma_{\text{Fe-N-C}}$ ) for the individual rate constants for the Fe-N-C catalyst.

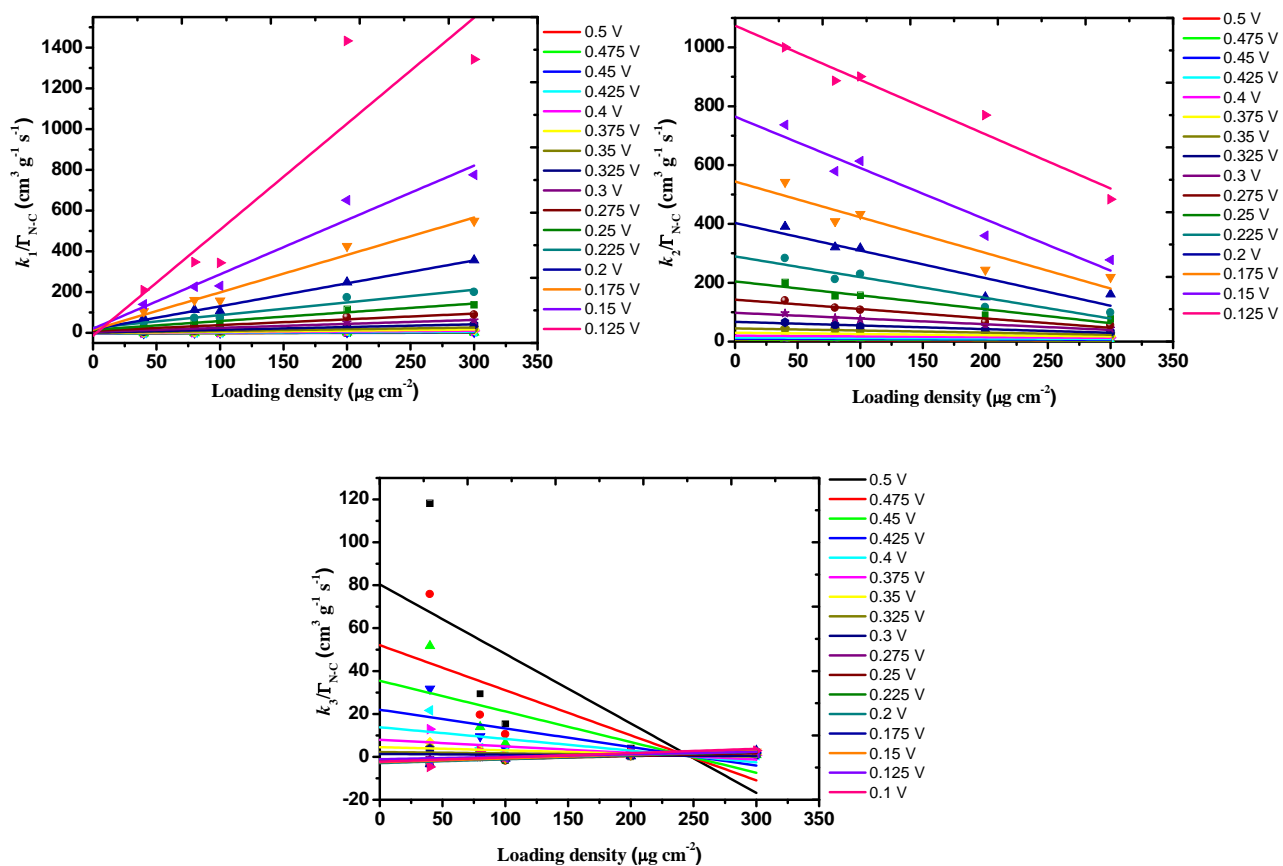

**Figure S3:** The loading density dependence of the loading density-normalised rate constants ( $k_i/\Gamma_{N-C}$ ) for the individual rate constants for the N-C catalyst.

### Estimation of $\text{H}_2\text{O}_2$ -disproportionation rate constants

Methodology for the estimation of disproportionation rate constant of  $\text{H}_2\text{O}_2$  has been already established by Jaouen and Dodelet [*J. Phys. Chem. C* **2009**, *113*, 15422-15432]. Briefly, a known amount (2 mg) of each of the catalysts was added to the known volume (50 mL) of  $\text{O}_2$ -saturated 0.1 M  $\text{HClO}_4$  and the solution was stirred with a uniform distribution of the catalyst. 51.1  $\mu\text{L}$  of 30%  $\text{H}_2\text{O}_2$  was added to the solution, resulting in an initial  $\text{H}_2\text{O}_2$  concentration of 10 mM. Immediately after addition of  $\text{H}_2\text{O}_2$ , the RRDE voltammetric diffusion-limited current ( $I_{\text{DL,t}}$ ) was measured at constant intervals with the Pt/C electrode

(the loading density of the Pt/C electrode is  $37.2 \mu\text{g}/\text{cm}^2$ ) at 1600 rpm rotational speed. The RRDE voltammogram was also measured before the addition of  $\text{H}_2\text{O}_2$  in the  $\text{O}_2$ -saturated solution and the obtained time-independent current limited by  $\text{O}_2$  diffusion is mentioned as  $I_{\text{DL},\text{O}_2}$ . Finally, the time-dependent  $\text{H}_2\text{O}_2$  diffusion-limited current ( $I_{\text{DL},\text{H}_2\text{O}_2}$ ) was calculated as follows

$$I_{\text{DL},\text{H}_2\text{O}_2} = I_{\text{DL},t} - I_{\text{DL},\text{O}_2} \quad (\text{S2})$$

The rate constants ( $k_4$ ) of the homogeneous disproportionation reaction of  $\text{H}_2\text{O}_2$  can be calculated from  $\log(I_{\text{DL},\text{H}_2\text{O}_2})$  vs. time plots as shown in Figure S4. The slopes for the both catalysts gave the values of  $k_4$ .

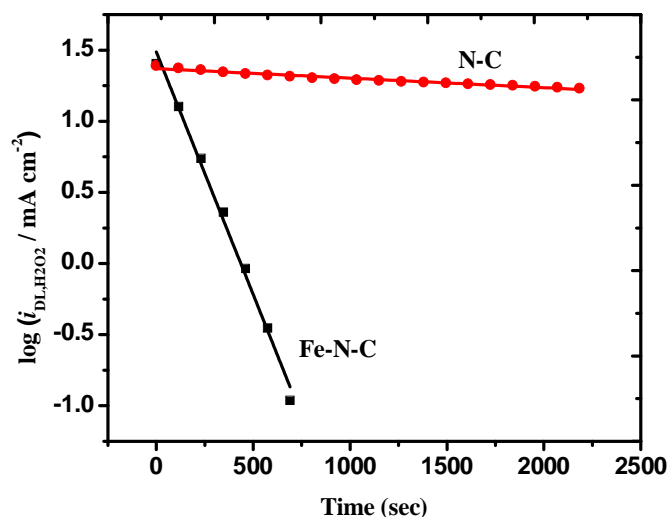

**Figure S4.**  $\log(I_{\text{DL},\text{H}_2\text{O}_2})$  vs. time plots for Fe-N-C and N-C catalysts. The rotating disk electrode voltammetry was carried out using the Pt/C-coated GC electrode (the coating amount of Pt/C:  $37 \mu\text{g cm}^{-2}$ ) at potential scan rate of  $20 \text{ mV s}^{-1}$  and electrode rotation speed of 1600 rpm in  $\text{O}_2$ -saturated  $0.1 \text{ M HClO}_4$  solution containing  $10 \text{ mM H}_2\text{O}_2$  in the presence of each catalyst of  $2 \text{ mg}$ . The  $I_{\text{DL},\text{H}_2\text{O}_2}$  values were taken at  $0.2 \text{ V}$ .

To compare the thus-estimated disproportionation rate constants with the ORR rate constants, the unit ( $\text{cm s}^{-1}$ ) of  $k_1$ ,  $k_2$  and  $k_3$  needs to be converted to the same unit of the homogenous rate constant ( $k_4$ ) by taking into account the thickness ( $l$ ) of the catalyst coated

on the electrode. The ORR rate constants divided by the thickness of the film leads to the unit of  $s^{-1}$ . The thickness of the film coated on the GC surface was estimated as  $23 \pm 3 \mu m$  using 3D laser Scanning Microscope (Keyence Co., Japan). Finally, the  $k_1/l$ ,  $k_2/l$  and  $k_3/l$  are calculated as 95.7, 12.8 and  $1.9 s^{-1}$ , respectively, for the Fe-N-C and 126.1, 66.9 and  $0.2 s^{-1}$ , respectively, for the N-C catalyst. The  $k_4$  is normalized by the amount of the catalyst coated on the electrode for the comparison and the estimated values are  $9.2 \times 10^{-5}$  and  $2.0 \times 10^{-6} s^{-1}$  for Fe-N-C and N-C catalysts, respectively. These values are very low compared with the  $k_1/l$ ,  $k_2/l$  and  $k_3/l$  and hence the disproportionation of  $H_2O_2$  is negligible. From the mechanistic point of view it is expected that  $k_4$  might influence on  $k_3$ , but not on  $k_1$  and  $k_2$ . As mentioned above,  $k_4$  is too small compared to the  $k_3$ . [Wu *et al.* Langmuir **2015**, *31*, 5529-5536] Hence the catalytic disproportionation reaction of  $H_2O_2$  on these catalysts is considered to be very slow and it is negligible.

### Wroblowa model

The RRDE voltammetric equations are derived by Damjanovic *et al.* for the evaluation of the rate constants ( $k_1$ ,  $k_2$  and  $k_3$ ) for a model of ORR shown in Scheme 1 and are expressed as follows.

$$\frac{I_D}{I_R} = \frac{1}{N} \left[ \left( 1 + 2 \frac{k_1}{k_2} \right) + \left( \frac{2k_3 \left( 1 + \frac{k_1}{k_2} \right)}{Z_{H_2O_2}} \right) \omega^{-1/2} \right] \quad (S3)$$

$$\frac{I_{DL}}{I_{DL} + I_D} = 1 + \frac{k_1 + k_2}{Z_{O_2}} \omega^{-1/2} \quad (S4)$$

$$\text{with } Z_{H_2O_2} = 0.2 D_{H_2O_2}^{2/3} \nu^{-1/6} \text{ and } Z_{O_2} = 0.2 D_{O_2}^{2/3} \nu^{-1/6}$$

where  $I_D$  is the disk current,  $I_R$  is the ring current,  $I_{DL}$  is the disk limiting current,  $\omega$  is the rotational speed of electrode,  $N$  is the collection efficiency,  $D_{H_2O_2}$  and  $D_{O_2}$  are the diffusion coefficients of  $H_2O_2$  and  $O_2$ , respectively and  $\nu$  is the kinematic viscosity of the solution used. By combining the intercepts and slopes of both  $I_D/I_R$  vs.  $\omega^{-1/2}$  and  $I_{DL}/(I_{DL} - I_D)$  vs.  $\omega^{-1/2}$  plots, the individual rate constants are obtained.

By taking into account the adsorption equilibrium between the adsorbed and desorbed  $\text{H}_2\text{O}_2$  near the disk electrode surface, Wroblowa et al. derived the RRDE voltammetric equations for the model for ORR shown in Scheme 2. A liner plot of  $I_{\text{DL}}/(I_{\text{DL}}-I_{\text{D}})$  vs.  $\omega^{-1/2}$ , which was confirmed actually in the present case, indicates that  $k_4$  is negligibly small and the relation between  $I_{\text{DL}}/(I_{\text{DL}}-I_{\text{D}})$  and  $\omega^{-1/2}$  is exactly the same as equation (S4) and the  $I_{\text{D}}/I_{\text{R}} - \omega^{-1/2}$  relation is expressed by the following equation:

$$\frac{I_{\text{D}}}{I_{\text{R}}} = \frac{1}{N} \left[ \left( 1 + 2 \frac{k_1}{k_2} \right) + A + \left( \frac{Ak_6}{Z_{\text{H}_2\text{O}_2}} \right) \omega^{-1/2} \right] \quad (\text{S5})$$

where  $A = \frac{2k_1k_3}{k_2k_5} + \frac{2k_3}{k_5}$ . The intercept and slope of  $I_{\text{D}}/I_{\text{R}}$  vs.  $\omega^{-1/2}$  plot according to equation (S5) are

$$J = \frac{1}{N} \left( 1 + 2 \frac{k_1}{k_2} + A \right) \quad (\text{S6})$$

and

$$S = \frac{1}{N} \left( \frac{Ak_6}{Z_{\text{H}_2\text{O}_2}} \right), \quad (\text{S7})$$

respectively. The relation between  $J$  and  $S$  is given by

$$NJ = \left( 1 + 2 \frac{k_1}{k_2} \right) + \frac{Z_{\text{H}_2\text{O}_2}}{k_6} NS \quad (\text{S8})$$

Finally, some important conclusions have been drawn from the  $NJ$  vs.  $NS$  plots.

If  $k_1 = 0$  and the plot is linear, the intercept of the  $NJ$  vs.  $NS$  plot must be unity. In that case, the ORR is considered to follow the sequential mechanism.

If  $k_1$  is not equal to zero (i.e., the intercept is greater than unity) and the plot is still linear,  $k_1$  and  $k_2$  have similar potential dependence. The values of  $k_6$  and  $k_1/k_2$  can be estimated from the slope and intercept, respectively.

If  $k_1$  is not equal to zero and the plot is not linear,  $k_1$  and  $k_2$  are different functions of potential.
